# Supplementary material for: Nitrogen-enriched flexible metal–organic framework for CO2 adsorption
Source: Royal Society of Chemistry journal article supplement (doi:10.1039/d4dt01457j), 2024-01-01
Supplement: d4dt01457j1.pdf [file d4dt01457j1.pdf]

## Supporting Information

### Nitrogen-Enriched Flexible Metal-Organic Framework for CO<sub>2</sub> Adsorption

Andrés Lancheros<sup>1,2,3\*</sup>, Subhadip Goswami<sup>3</sup>, Ximena Zarate<sup>4</sup>, Eduardo Schott<sup>1,2\*\*</sup>, Joseph T. Hupp<sup>3</sup>

<sup>1</sup>Department of Inorganic Chemistry, Faculty of Chemistry and Pharmacy, UC Energy Center, Center for Research in Nanotechnology and Advanced Materials (CIEN-UC), Pontificia Universidad Católica de Chile, Av. Vicuña Mackenna 4860, Santiago, Chile

<sup>2</sup>ANID -Millennium Science Initiative Program- Millennium Nuclei on Catalytic Process Towards Sustainable Chemistry (CSC), Chile

<sup>3</sup>Department of Chemistry and International Institute for Nanotechnology, Northwestern University, 2145 Sheridan Road, Evanston, Illinois 60208, United States

<sup>4</sup>Institute of Applied Sciences, Faculty of Engineering, Universidad Autónoma de Chile, Av. Pedro de Valdivia 425, Santiago, Chile

#### Synthesis and characterization of the linker

The linker was synthesized according to the reaction shown in scheme 1.

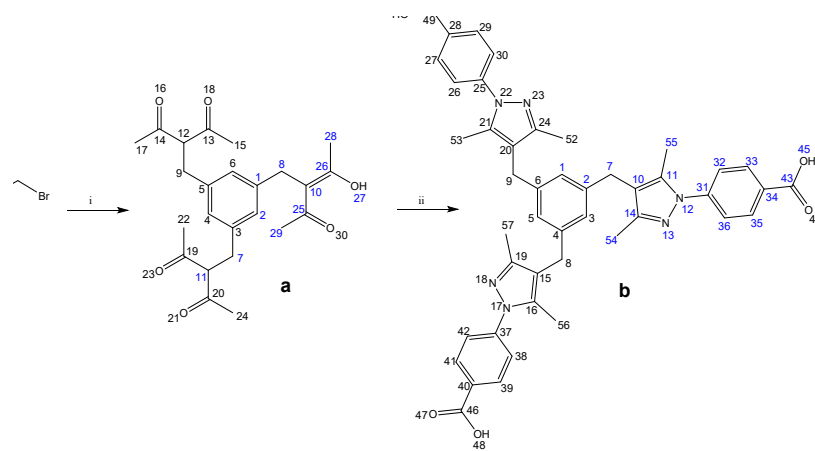

- i) acac, KOt-Bu, THF dry, KI, N<sub>2</sub>, 24 h, reflux  
ii) AcOH, EtOAc, 4-hydrazinobenzoic acid, 24 h, reflux

**Scheme 1.** Synthesis of the linker

**Step 1.** Synthesis of (Z)-3,3'-((5-(2-acetyl-3-hydroxybut-2-en-1-yl)-1,3-phenylene)bis(methylene))bis(pentane-2,4-dione) (Precursor-a)

In a 250 mL two-necked round-bottomed flask with a magnetic stir bar and reflux condenser under nitrogen atmosphere was added potassium (1.72 g, 0.044 mol) and dry tert-butyl alcohol (57.15 mL). The mixture was heated to reflux and stirring for three hours until complete dissolution of the potassium. Next, acetylacetone (6.43 g, 0.064 mol) was added dropwise to the stirred, refluxing solution. After 1 hour, the solution of 1,3,5-tris(bromomethyl)benzene (5.00 g, 0.014 mol) in dry tetrahydrofuran (72 mL) was added dropwise, it was left for another hour and then potassium iodide (0.43 g) was added. The reaction mixture was stirred and heated at reflux temperature for 24 hours. Three-fourths of the solvent was extracted by distillation and then washed with water and extracted with benzene. The organic phase was dried over magnesium sulfate anhydrous, solvent and excess acetylacetone was removed in vacuum obtaining a dark-yellow oil. Finally, the product was purified by column chromatography on silica gel (acetone/hexane 1:4 v/v) to afford a light-yellow oil.

$^1\text{H}$  NMR assignments for  $\text{C}_i$  correspond to mono and dienol molecules involved in the tautomeric equilibrium, so the number of H is the sum of the moiety in both of them.

**Yield:** 47.36%.  **$^1\text{H}$  NMR** (400 MHz,  $\text{CDCl}_3$ , 298K):  $\delta/\text{ppm}$ = 16.77 (s, 18H,  $\text{H}_{27}$ ), 6.73 (s, 6H,  $\text{H}_2$ ), 3.92 (t,  $J_{\text{HH}}=7.55$  Hz, 3H,  $\text{H}_{11}$ ), 3.57 (s, 6H,  $\text{H}_8$ ), 3.08 (q, 7.55  $J_{\text{HH}}=7.55$  Hz, 6H,  $\text{H}_7$ ), 2.10 (s, 18H,  $\text{H}_{29}$ ), 2.04 (s, 18H,  $\text{H}_{28}$ ).  **$^{13}\text{C}$  NMR { $^1\text{H}$ }** (100 MHz,  $\text{CDCl}_3$ , 298K):  $\delta/\text{ppm}$ = 203.32 ( $\text{C}_{25}$ ), 191.94( $\text{C}_{26}$ ), 140.96 ( $\text{C}_3$ ), 139.09 ( $\text{C}_1$ ), 125.74 ( $\text{C}_2$ ), 108.22 ( $\text{C}_{10}$ ), 69.93 ( $\text{C}_{11}$ ), 34.04 ( $\text{C}_7$ ), 32.89 ( $\text{C}_8$ ), 29.70 ( $\text{C}_{29}$ ), 23.41 ( $\text{C}_{28}$ ). **DEPT-135** (100 MHz,  $\text{DMSO-d}_6$ , 298 K):  $\delta/\text{ppm}$  =125.62 ( $\text{C}_2$ ), 69.80 ( $\text{C}_{11}$ ), 33.97( $\text{C}_7$ ), 32.76 ( $\text{C}_8$ ), 29.65 ( $\text{C}_{29}$ ), 23.28 ( $\text{C}_{28}$ ).  **$^1\text{H},^{13}\text{C}$ -HSQC** (400 MHz/100 MHz,  $\text{CDCl}_3$ , 298 K):  $\delta(^1\text{H})/\delta(^{13}\text{C})$  = 6.72/125.75 ( $\text{H}_2/\text{C}_2$ ), 3.89/69.91 ( $\text{H}_{11}/\text{C}_{11}$ ), 3.54/32.88 ( $\text{H}_8/\text{C}_8$ ), 3.03/34.03 ( $\text{H}_7/\text{C}_7$ ), 2.07/29.72 ( $\text{H}_{29}/\text{C}_{29}$ ), 2.00/23.40 ( $\text{H}_{28}/\text{C}_{28}$ ).  **$^1\text{H},^{13}\text{C}$ -HMBC** (400 MHz/100 MHz,  $\text{CDCl}_3$ , 298 K):  $\delta(^1\text{H})/\delta(^{13}\text{C})$ = 3.54/108.22, 125.75, 140.96, 191.94 ( $\text{H}_8/\text{C}_{10/2/3/26}$ ), 3.03/125.75 ( $\text{H}_7/\text{C}_2$ ), 2.07/203.32 ( $\text{H}_{29}/\text{C}_{25}$ ), 2.00/191.94 ( $\text{H}_{28}/\text{C}_{26}$ ). **FT-IR (Nujol):**  $\nu/\text{cm}^{-1}$ = 3530 (w), 3410 (w), 3010 (w), 2924 (m), 2853 (w), 1727 (s), 1605 (m), 1450 (m), 1358 (m), 1257 (w), 1149 (s), 956 (s), 841 (w), 748 (m), 710 (w), 625 (w), 525 (m), 447 (w), 301 (s), 270 (s). **HRMS(HESI):**  $m/z$  [ $\text{M}+\text{H}$ ] $^+$  calculated for  $\text{C}_{24}\text{H}_{30}\text{O}_6$  (415.21), found 415.21. **UV-Vis** (nm): 292.

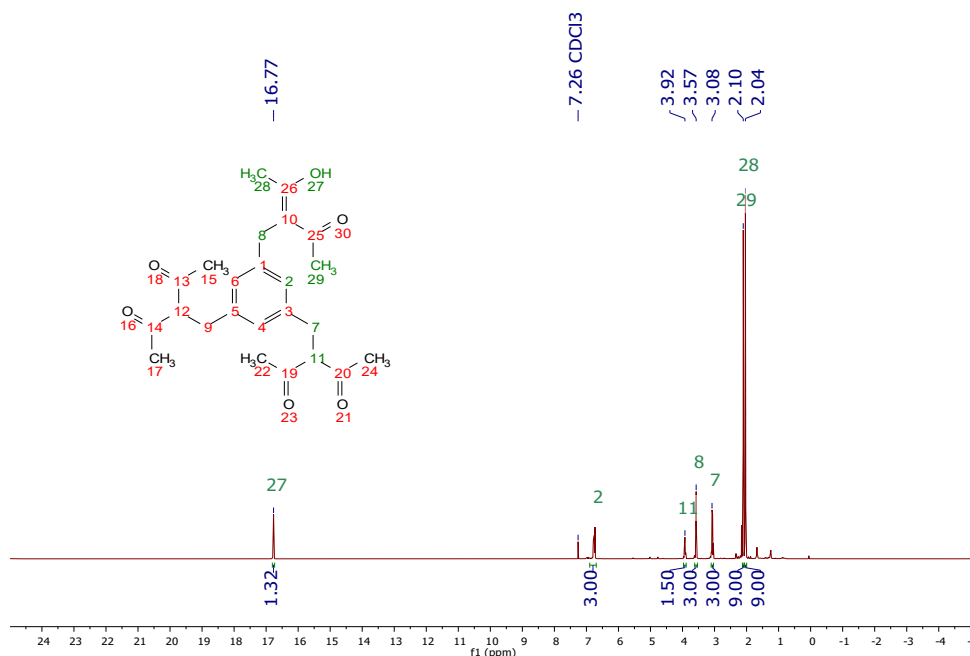

**Figure S1.** 400 MHz  $^1\text{H}$  NMR spectrum of the precursor in  $\text{CDCl}_3$

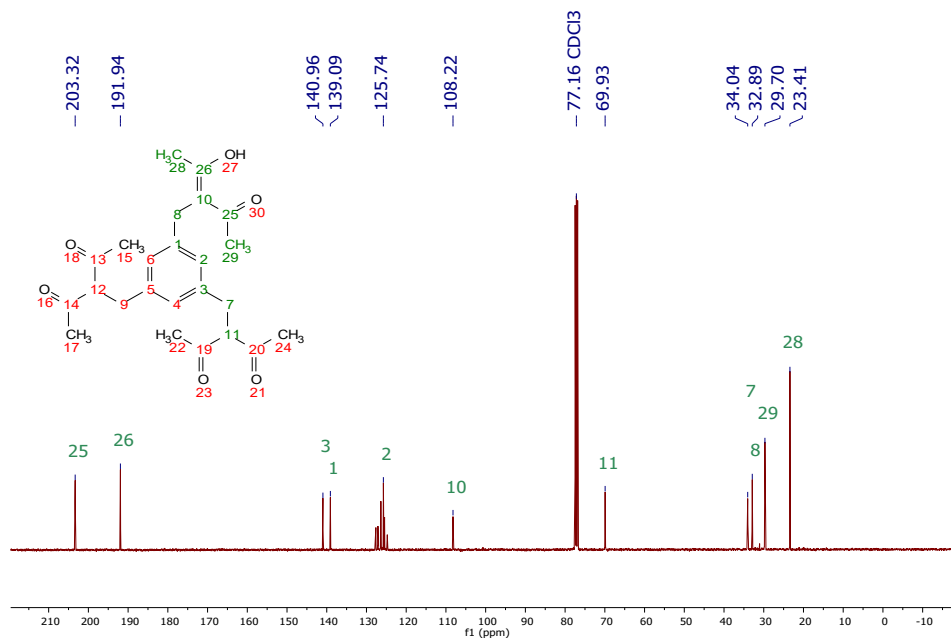

Figure S2. 400 MHz <sup>13</sup>C NMR spectrum of the precursor in CDCl<sub>3</sub>

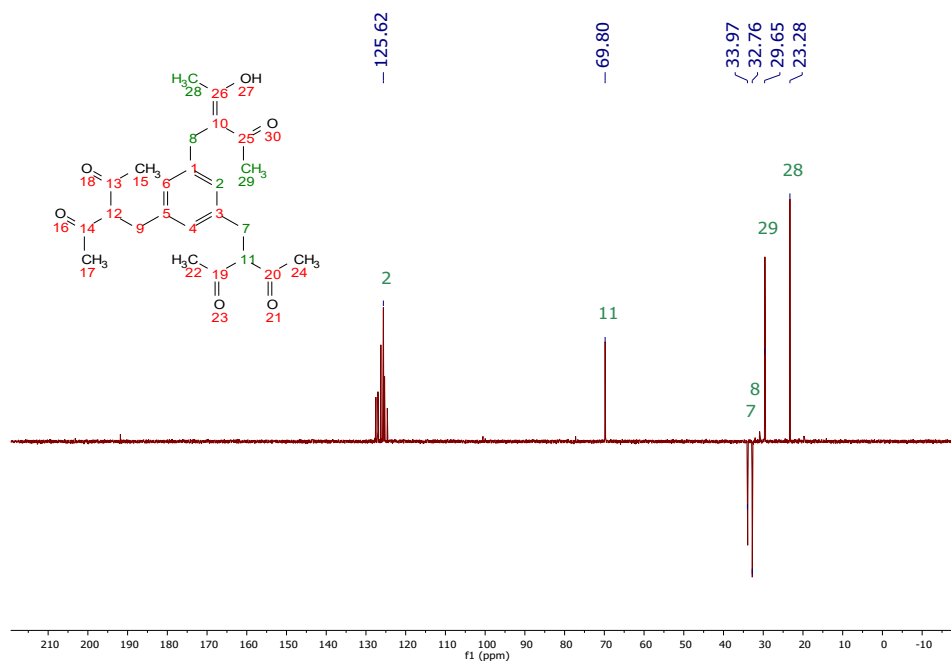

Figure S3. DEPT-135 NMR spectrum of the precursor in CDCl<sub>3</sub>

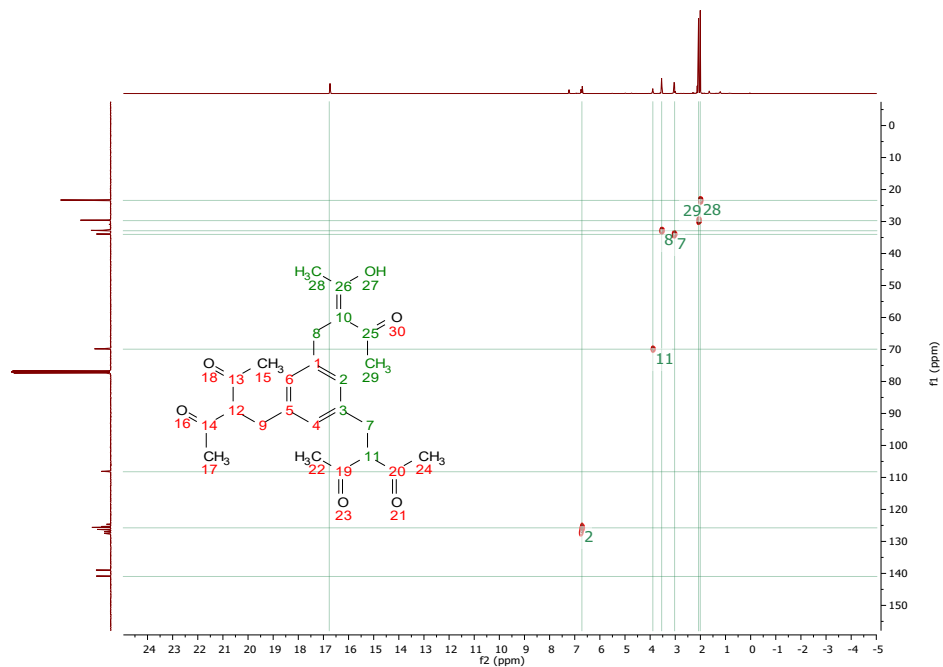

Figure S4. 400 MHz HSQC NMR spectrum of the precursor in  $\text{CDCl}_3$

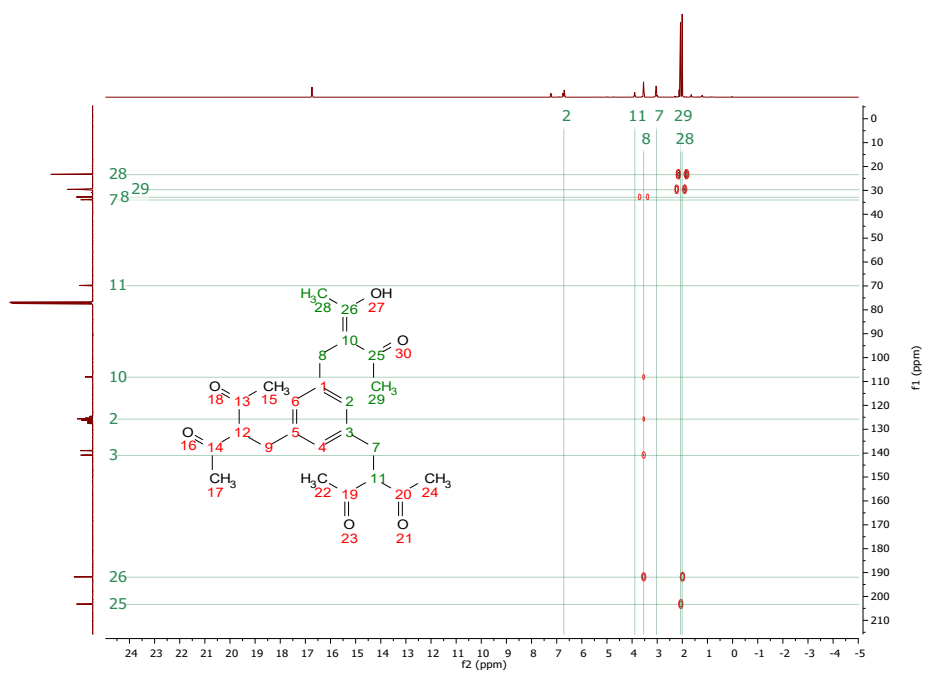

Figure S5. 400 MHz HMBC NMR spectrum of the precursor in  $\text{CDCl}_3$

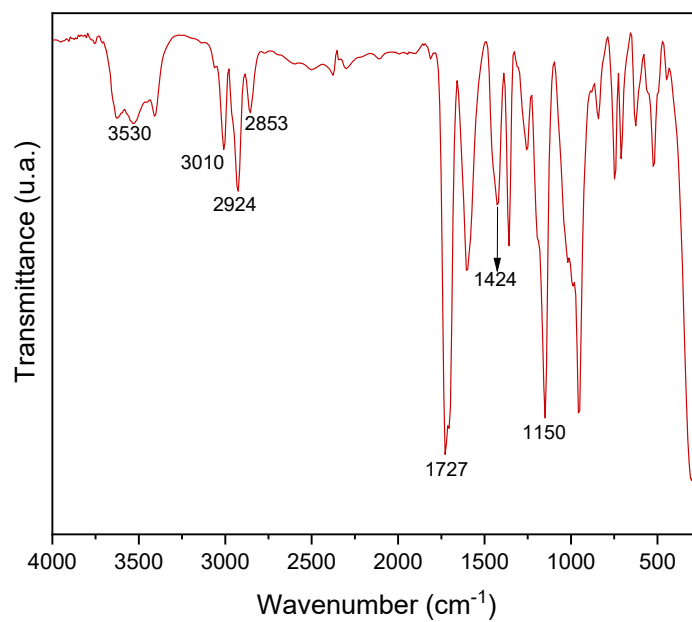

**Figure S6.** FT-IR Spectrum of the precursor in KBr

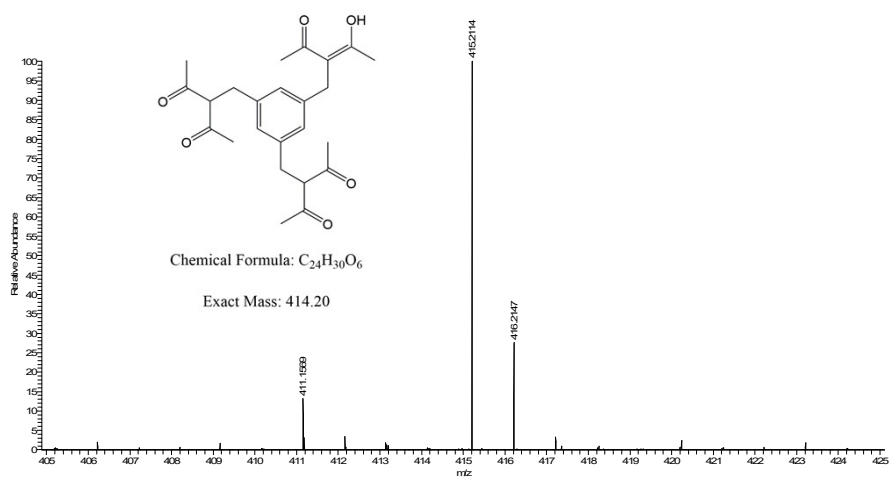

**Figure S7.** HRMS Spectrum of the precursor

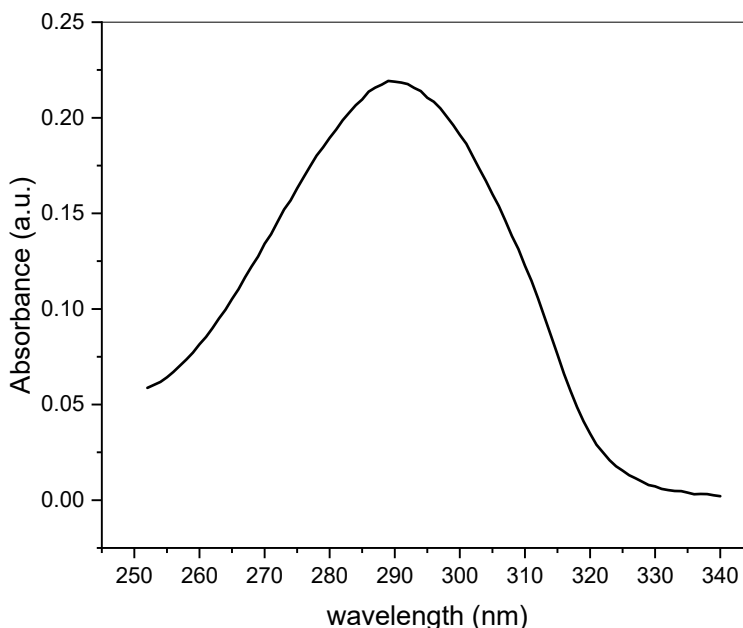

**Figure S8.** UV-Vis Spectrum of the precursor in  $\text{CHCl}_3$  [0.001 M]

**Step 2.** 4,4',4''-(4,4',4''-(benzene-1,3,5-triyltris(methylene))tris(3,5-dimethyl-1H-pyrazole-4,1-diyl))tribenzoic acid (Linker)

The precursor a (1.60 g, mmol), ethyl acetate (75 mL) and acetic acid (15 mL) were added to a 500 mL two-neck round bottom flask with a magnetic stir bar and a reflux condenser. It was heated to reflux to dissolve the mixture and stirred for 1 hour. Then, to the dissolution, 4-hydrazinobenzoic acid (1.71 g, 11.238 mmol) was added and kept under reflux and stirring for 24 hours. The product obtained was filtrated and washed with water and ethyl acetate (x3). Finally, it was dried in a vacuum oven at 60 °C for 12 hours.

**$^1\text{H}$  NMR** (400 MHz,  $\text{CDCl}_3$ , 298K):  $\delta$ /ppm= 13.01 (s, 1H,  $\text{H}_{45}$ ), 8.00 (d,  $J_{\text{HH}}=8.62$  Hz, 2H,  $\text{H}_{33,35}$ ), 7.58 (d,  $J_{\text{HH}}=8.62$  Hz, 2H,  $\text{H}_{32,36}$ ), 6.79 (s, 1H,  $\text{H}_3$ ), 3.69 (s, 2H,  $\text{H}_7$ ), 2.25 (s, 3H,  $\text{H}_{55}$ ), 2.04 (s, 3H,  $\text{H}_{54}$ ).  **$^{13}\text{C}$  NMR** ( $^1\text{H}$ ) (100 MHz,  $\text{CDCl}_3$ , 298K):  $\delta$ /ppm= 166.68 ( $\text{C}_{43}$ ), 148.24 ( $\text{C}_{14}$ ), 143.16 ( $\text{C}_{31}$ ), 140.80 ( $\text{C}_2$ ), 136.46 ( $\text{C}_{11}$ ), 130.29 ( $\text{C}_{33,35}$ ), 128.42 ( $\text{C}_{34}$ ), 125.37 ( $\text{C}_1$ ), 123.01 ( $\text{C}_{32,26}$ ), 117.94 ( $\text{C}_{10}$ ), 28.57 ( $\text{C}_7$ ), 11.87 ( $\text{C}_{54}$ ), 11.18 ( $\text{C}_{55}$ ). **DEPT-135** (100 MHz,  $\text{DMSO-d}_6$ , 298 K):  $\delta$ /ppm = 130.03 ( $\text{C}_{33,35}$ ), 125.11 ( $\text{C}_3$ ), 122.75 ( $\text{C}_{32,26}$ ), 28.31 ( $\text{C}_7$ ), 11.62 ( $\text{C}_{54}$ ), 10.92 ( $\text{C}_{55}$ ).  **$^1\text{H},^{13}\text{C}$ -HSQC** (400 MHz/100 MHz,  $\text{CDCl}_3$ , 298 K):  $\delta(^1\text{H})/\delta(^{13}\text{C})$  = 8.01/130.73 ( $\text{H}_{33,35}/\text{C}_{33,35}$ ), 7.59/123.46 ( $\text{H}_{32,36}/\text{C}_{32,36}$ ), 6.79/125.83 ( $\text{H}_3/\text{C}_3$ ), 3.70/29.02 ( $\text{H}_7/\text{C}_7$ ), 2.25/11.62 ( $\text{H}_{55}/\text{C}_{55}$ ), 2.04/12.37 ( $\text{H}_{54}/\text{C}_{54}$ ).  **$^1\text{H},^{13}\text{C}$ -HMBC** (400 MHz/100 MHz,  $\text{CDCl}_3$ , 298 K):  $\delta(^1\text{H})/\delta(^{13}\text{C})$  = 8.01/143.43, 166.63 ( $\text{H}_{33,35}/\text{C}_{34/43}$ ), 7.59/128.42 ( $\text{H}_{32,36}/\text{C}_{31}$ ), 6.79/28.55, 140.69 ( $\text{H}_3/\text{C}_{7/2}$ ), 3.69/117.90, 125.38, 136.43, 140.69, 148.20 ( $\text{H}_7/\text{C}_{10/3/11/2/14}$ ), 2.25/117.90, 136.43 ( $\text{H}_{55}/\text{C}_{10/11}$ ), 2.04/117.90, 148.20 ( $\text{H}_{54}/\text{C}_{10/14}$ ). **FT-IR (KBr)**:  $\nu/\text{cm}^{-1}$  = 3485 (w), 3169 (w), 2917 (w), 2517 (w), 2517 (w), 1929 (w), 1721 (s), 1603 (s), 1510 (m), 1427 (m), 1373 (m), 1263 (m), 1172 (w), 1103 (m), 1041 (m), 1018 (m), 957 (w), 918 (w), 864 (m), 810 (w), 779 (s), 548 (m), 517 (m), 409 (w). **HRMS(HESI)**:  $m/z$   $[\text{M}+\text{H}]^+$  calculated for  $\text{C}_{45}\text{H}_{42}\text{N}_6\text{O}_6$  (763.32), found 763.32. **UV-Vis** (nm): 292.

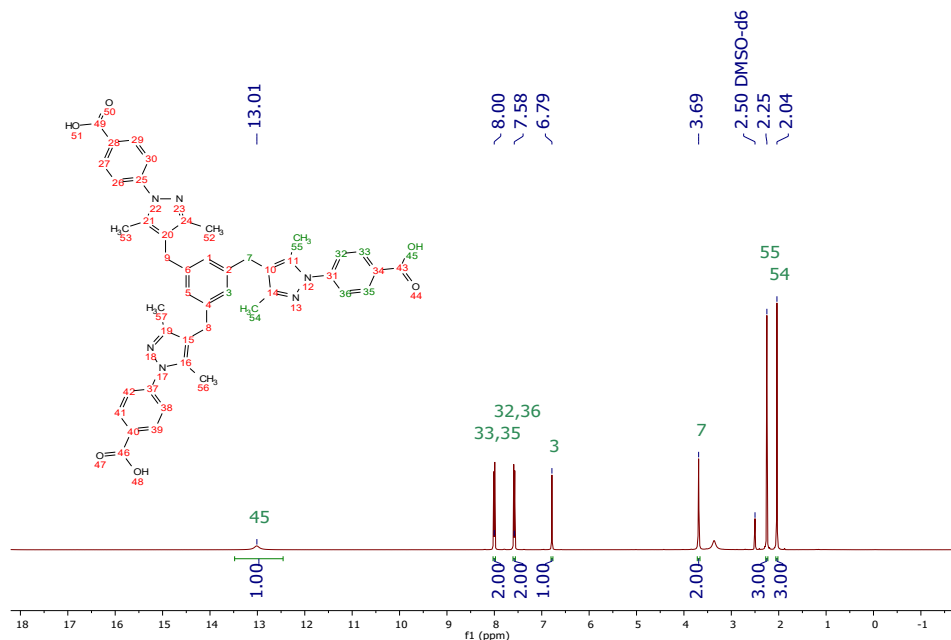

Figure S9. 400 MHz  $^1\text{H}$  NMR spectrum of the linker in  $\text{DMSO-d}_6$

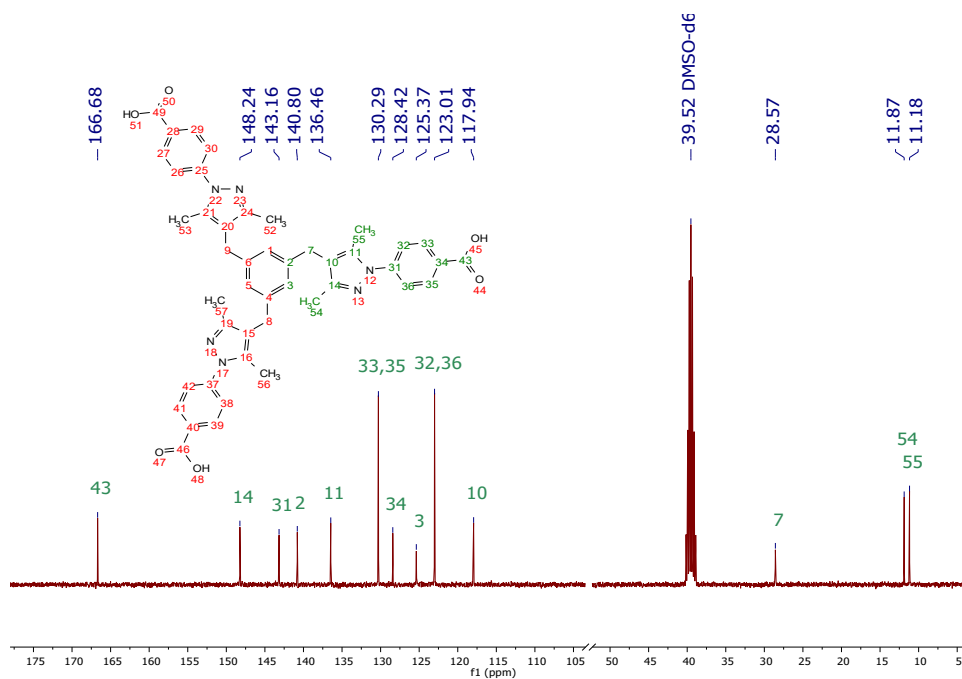

Figure S10. 400 MHz  $^{13}\text{C}$  NMR spectrum of  $\text{H}_2\text{L}$  in  $\text{DMSO-d}_6$

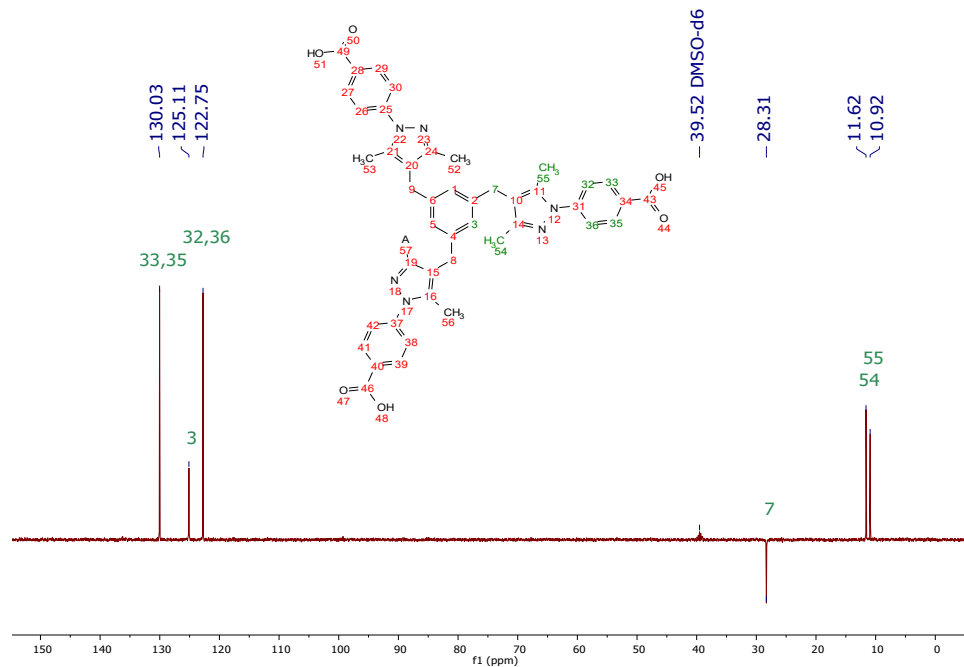

Figure S11. DEPT-135 NMR spectrum of the linker in DMSO-d<sub>6</sub>

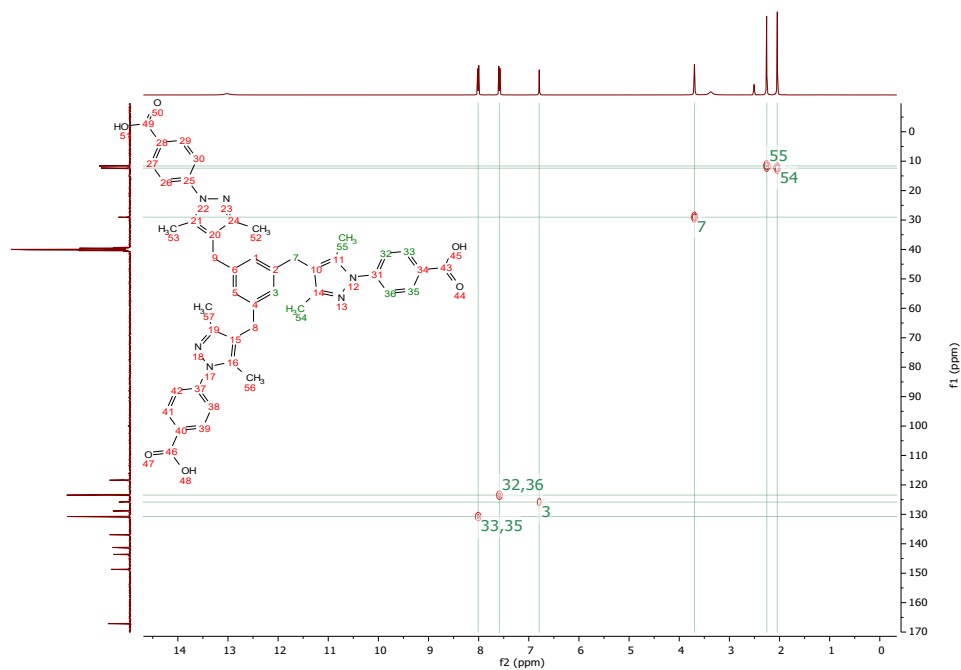

Figure S12. 400 MHz HSQC NMR spectrum of the linker in DMSO-d<sub>6</sub>



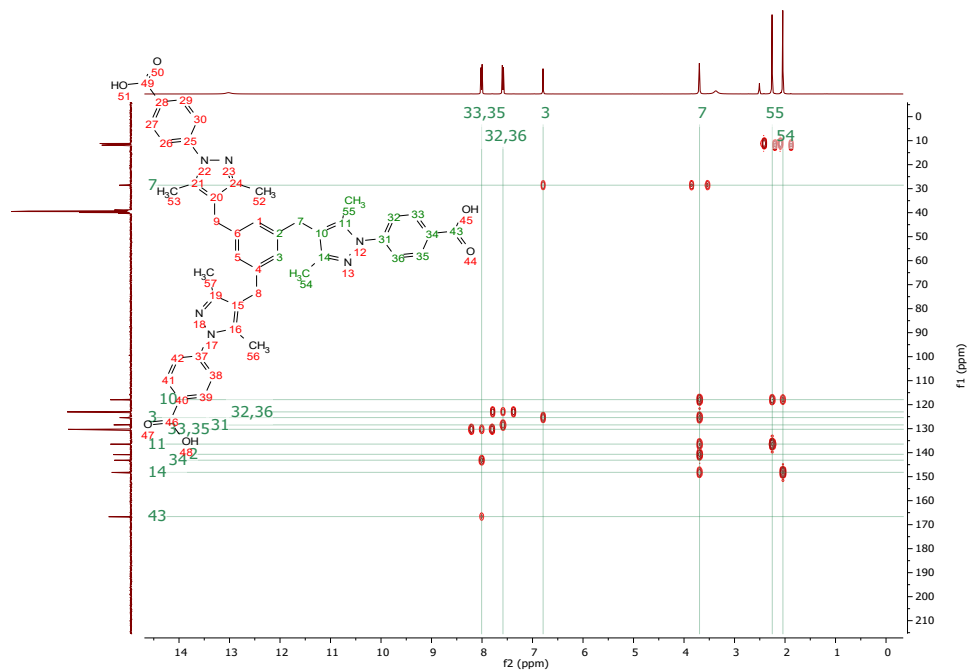

**Figure S13.** 400 MHz HMBC NMR spectrum of the linker in DMSO-d<sub>6</sub>

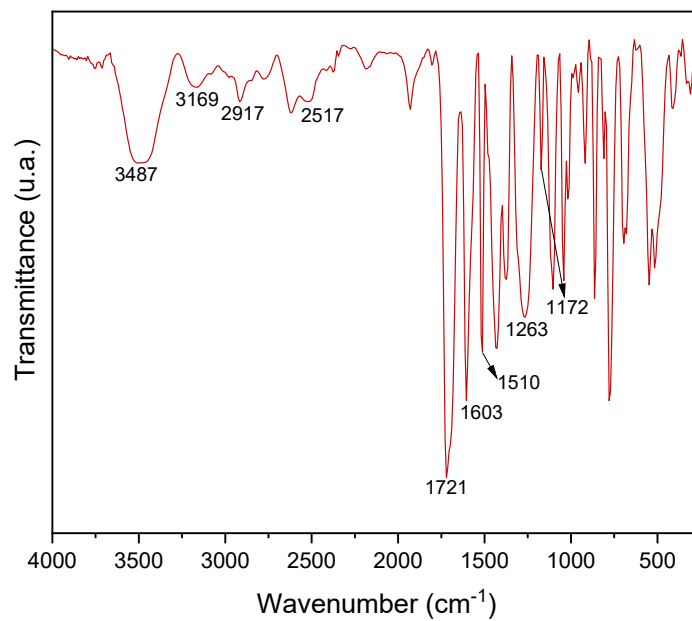

**Figure S14.** FT-IR Spectrum of the linker

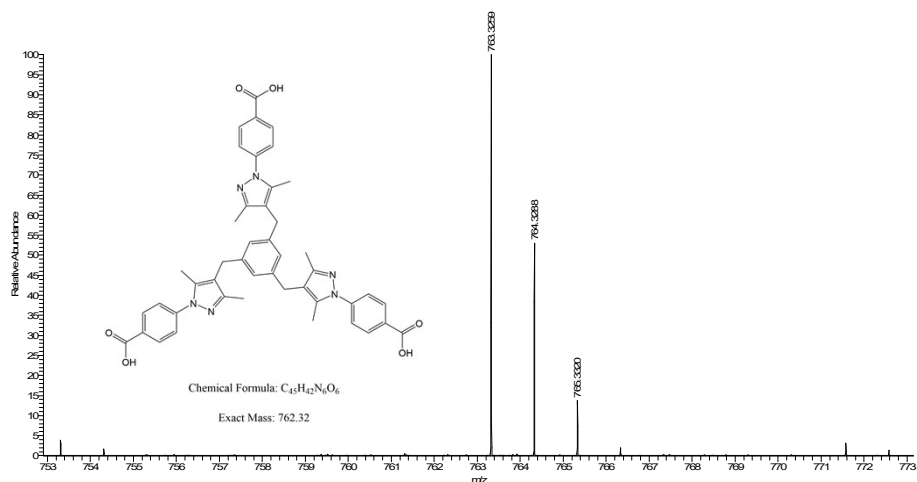

**Figure S15.** HRMS Spectrum of the linker

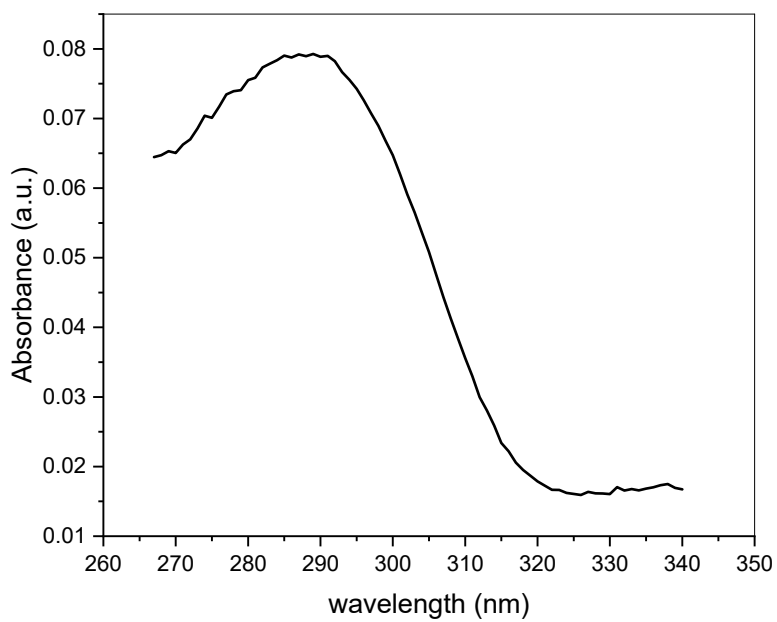

**Figure S16.** UV-Vis Spectrum of the linker in DMSO [0.001 M]

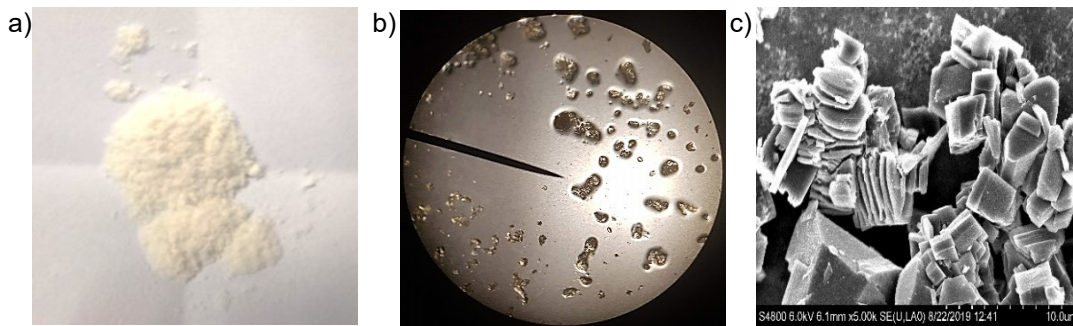

**Figure S17.** For  $[Zn_2(L)(DMF)]$ , a) Physical aspect b) Crystals images using an optical microscope (100x), and c) SEM image

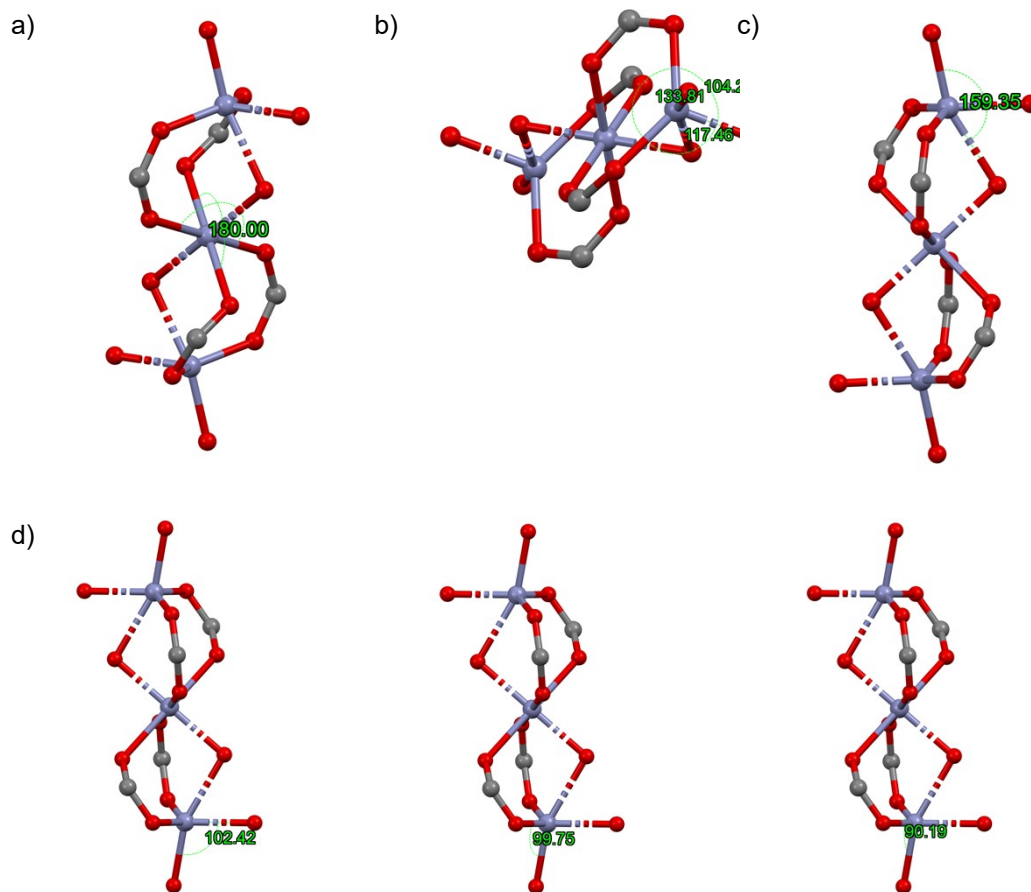

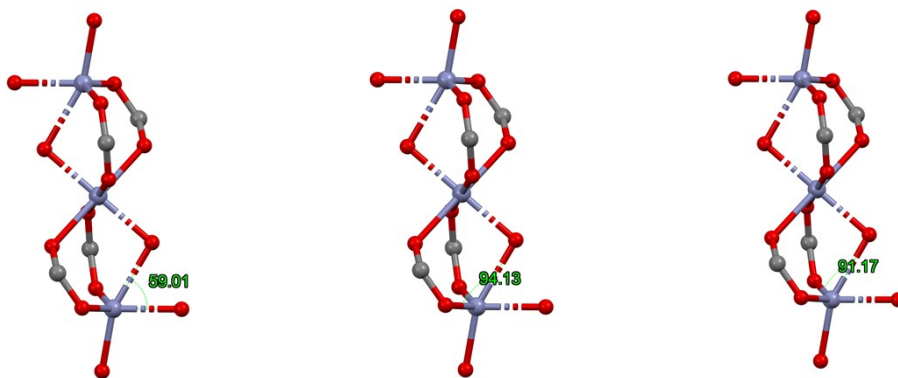

**Figure S18.** Angles O–Zn–O in the node of  $[Zn_2(L)DMF]$  in a) octahedral structure, b) trigonal bipyramidal in axial position, c) trigonal bipyramidal in equatorial positions, and d) between oxygens of axial and equatorial positions

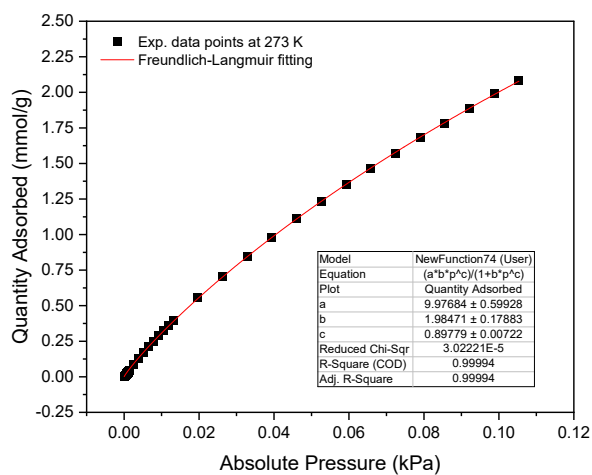

**Figure S19.** Freundlich–Langmuir fit for  $CO_2$  adsorption isotherm on  $[Zn_2(L)DMF]$  at 273 K.

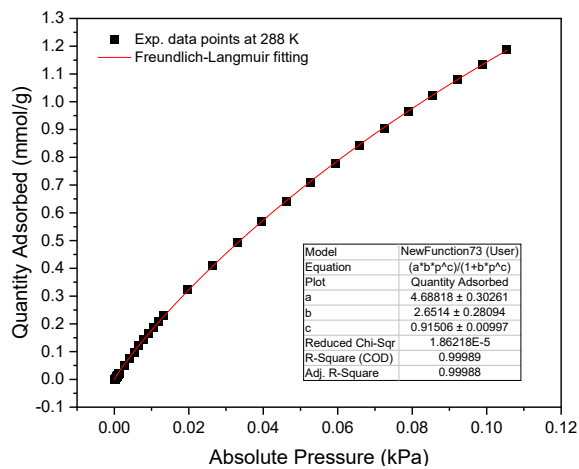

**Figure S20.** Freundlich–Langmuir fit for  $CO_2$  adsorption isotherm on  $[Zn_2(L)DMF]$  at 288 K.

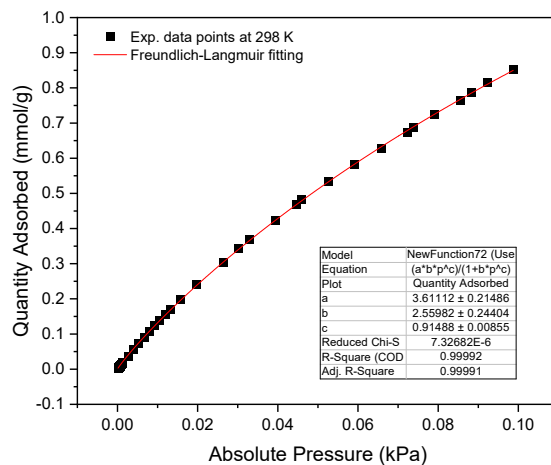

Figure S21. Freundlich–Langmuir fit for CO<sub>2</sub> adsorption isotherm on [Zn<sub>2</sub>(L)DMF] at 298 K.

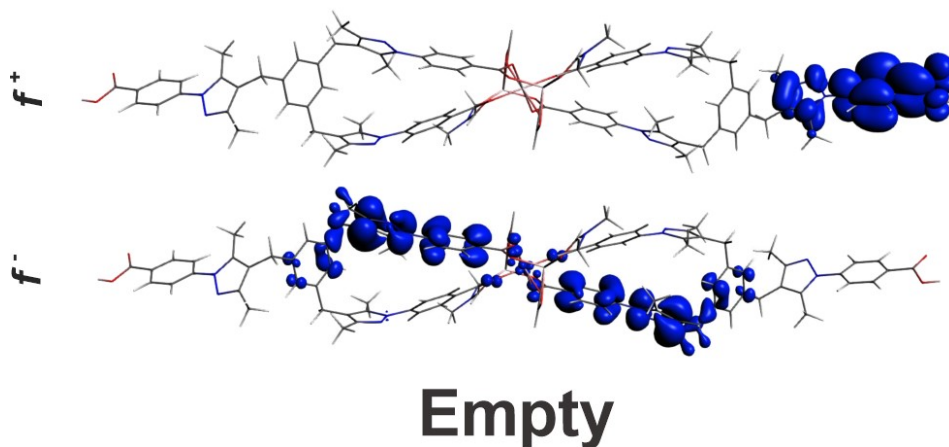

Figure S22. Frontier molecular orbital diagrams for the CO<sub>2</sub> system studied theoretically

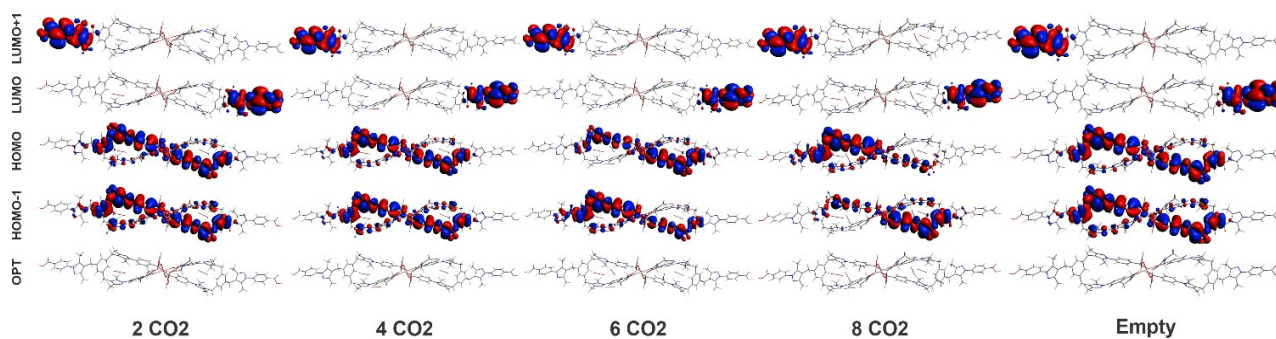

Figure S23. Fukui function plot for the empty MOF

**Table S1.** Crystal data and structure refinement for [Zn<sub>2</sub>(L)DMF]

| MOF                                         | [Zn <sub>2</sub> (L)DMF]                                                          |
|---------------------------------------------|-----------------------------------------------------------------------------------|
| Empirical formula                           | C <sub>102</sub> H <sub>106</sub> N <sub>16</sub> O <sub>16</sub> Zn <sub>3</sub> |
| Formula weight                              | 2008.13                                                                           |
| Temperature/K                               | 100.01(11)                                                                        |
| Crystal system                              | monoclinic                                                                        |
| Space group                                 | P2 <sub>1</sub> /n                                                                |
| a/Å                                         | 14.2475(3)                                                                        |
| b/Å                                         | 10.38151(15)                                                                      |
| c/Å                                         | 33.0497(5)                                                                        |
| α/°                                         | 90                                                                                |
| β/°                                         | 94.7685 (17)                                                                      |
| γ/°                                         | 90                                                                                |
| Volume/Å <sup>3</sup>                       | 4871.48 (15)                                                                      |
| Z                                           | 2                                                                                 |
| ρ <sub>calc</sub> (g/cm <sup>3</sup> )      | 1.369                                                                             |
| μ.mm <sup>-1</sup>                          | 0.807                                                                             |
| F(000)                                      | 2096                                                                              |
| Crystal size (mm <sup>3</sup> )             | 0.241 × 0.115 × 0.052                                                             |
| Radiation                                   | MoKα (λ = 0.71073)                                                                |
| 2θ range for data collection/°              | 4.114 to 67.738°                                                                  |
| Index ranges                                | -20 ≤ h ≤ 21, -15 ≤ k ≤ 15, -51 ≤ l ≤ 50                                          |
| Reflections collected                       | 112588                                                                            |
| Independent reflections                     | 17776 [R <sub>int</sub> = 0.0416]                                                 |
| Data/restraints/parameters                  | 17776/180/675                                                                     |
| Goodness-of-fit on F <sup>2</sup>           | 1.066                                                                             |
| Final R indexes [ >=2σ] <sub>eters</sub>    | R <sub>1</sub> = 0.0652,<br>wR <sub>2</sub> = 0.1723                              |
| Final R indexes [all data]                  | R <sub>1</sub> = 0.0879,<br>wR <sub>2</sub> = 0.1834                              |
| Largest diff. peak/hole / e Å <sup>-3</sup> | 1.636/-0.831                                                                      |
